# Supplementary material for: Effects of Rare Phytocannabinoids on the Endocannabinoid System of Human Keratinocytes
Source: MDPI journal article supplement (doi:10.3390/ijms23105430), 2022-05-12
Supplement: s1 [file s1]

# Effects of rare phytocannabinoids on the endocannabinoid system of human keratinocytes

Camilla Di Meo<sup>1\*</sup>, Daniel Tortolani<sup>2#</sup>, Sara Standoli<sup>1</sup>, Clotilde Beatrice Angelucci<sup>3</sup>, Federico Fanti<sup>1</sup>, Alessandro Leuti<sup>2,4</sup>, Manuel Sergi<sup>1</sup>, Salam Kadhim<sup>5</sup>, Eric Hsu<sup>5</sup>, Cinzia Rapino<sup>3\*</sup> and Mauro Maccarrone<sup>2,6\*</sup>

<sup>1</sup>Faculty of Bioscience and Technology for Food Agriculture and Environment, University of Teramo, Teramo, 64100, Italy; [cdimeo@unite.it](mailto:cdimeo@unite.it) (C.D.M.); [ssandoli@unite.it](mailto:ssandoli@unite.it) (S.S.); [ffanti@unite.it](mailto:ffanti@unite.it) (F.F.); [msergi@unite.it](mailto:msergi@unite.it) (M.S.)

<sup>2</sup>European Center for Brain Research (CERC)/Santa Lucia Foundation IRCCS, Rome, 00143, Italy; [daniel.tortolani88@gmail.com](mailto:daniel.tortolani88@gmail.com)

<sup>3</sup>Faculty of Veterinary Medicine, University of Teramo, Teramo, 64100, Italy; [bcangelucci@unite.it](mailto:bcangelucci@unite.it)

<sup>4</sup>Department of Medicine, Campus Bio-Medico University of Rome, Rome, Italy; [a.leuti@unicampus.it](mailto:a.leuti@unicampus.it)

<sup>5</sup>InMed Pharmaceuticals Inc., Vancouver BC, V6C 1B4, Canada; [ehsu@inmedpharma.com](mailto:ehsu@inmedpharma.com); [skadhim@inmedpharma.com](mailto:skadhim@inmedpharma.com)

<sup>6</sup>Department of Biotechnological and Applied Clinical Sciences, University of L'Aquila, 67100 L'Aquila, Italy

\*Equally first authors.

\*Correspondence: [crapino@unite.it](mailto:crapino@unite.it) (C.R.); [mauro.maccarrone@univaq.it](mailto:mauro.maccarrone@univaq.it) (M.M.)

## Supplementary Materials

Viability, apoptosis, and cell cycle of human HaCaT cells treated with different pCBs

### CANNABIGEROL (CBG)

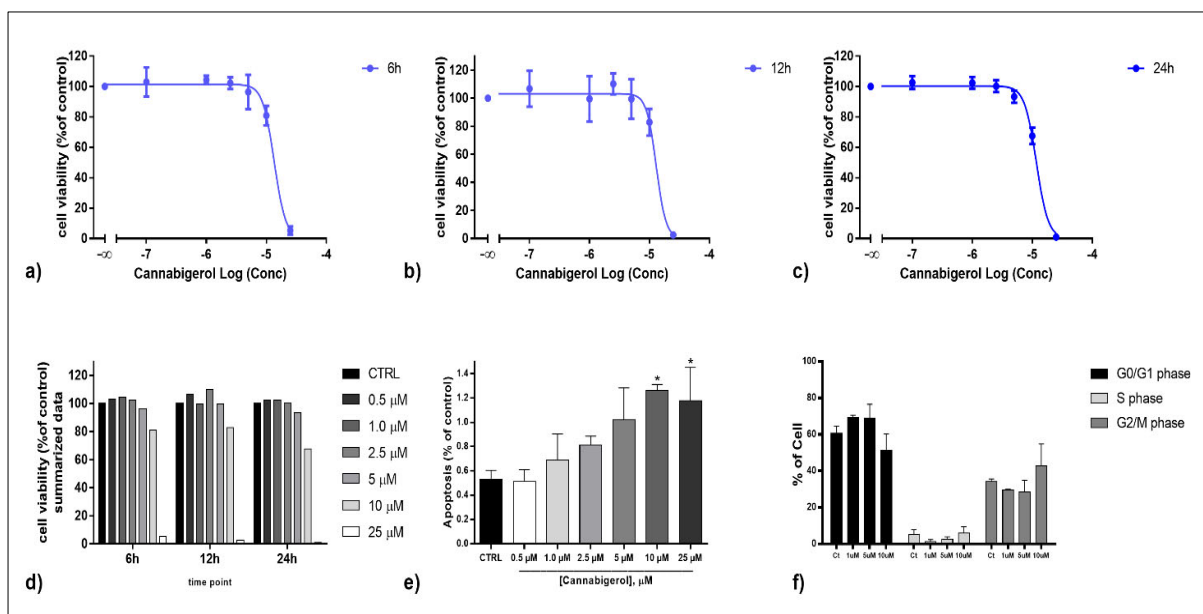

**Figure S1.** Viability, apoptosis, and cell cycle of human HaCaT cells treated with CBG. Cell viability of HaCaT cells treated with vehicle (CTRL) or increasing concentrations of CBG (0.5  $\mu$ M, 1.0  $\mu$ M, 2.5  $\mu$ M, 5.0  $\mu$ M, 10  $\mu$ M, 25  $\mu$ M), at the following time points: a) 6h, b) 12h, c) 24h. Values represent the mean  $\pm$  SEM of three independent experiments (n = 3). d) Summary of cell viability data shown in panels a-c. e) Apoptosis of HaCaT cells treated with vehicle (CTRL) or increasing concentrations of CBG (0.5  $\mu$ M, 1.0  $\mu$ M, 2.5  $\mu$ M, 5.0  $\mu$ M, 10  $\mu$ M, 25  $\mu$ M) for 24h. f) Cell cycle analysis of HaCaT cells treated with vehicle (CTRL) or increasing concentrations of CBG (1.0  $\mu$ M, 5.0  $\mu$ M, 10  $\mu$ M) for 24h. Values represent the mean  $\pm$  SEM of three independent experiments (n = 3). Statistical analysis was performed by ONE-WAY ANOVA test followed by Bonferroni post hoc test. \*P<0.05 vs CTRL.

## CANNABICHROMENE (CBC)

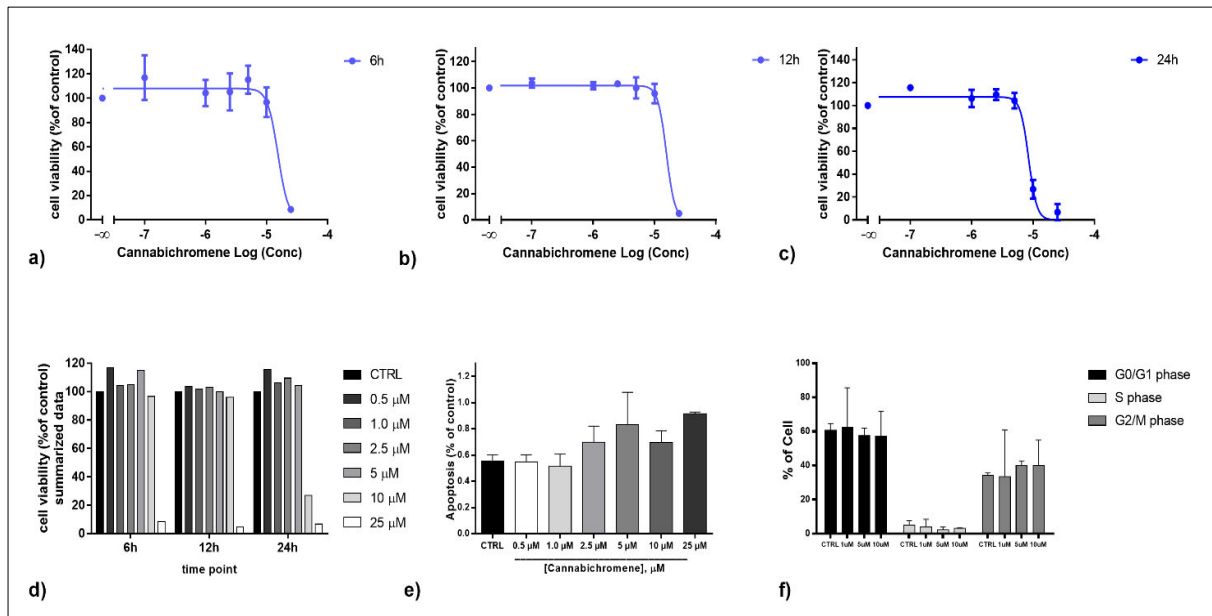

**Figure S2.** Viability, apoptosis, and cell cycle of human HaCaT cells treated with CBC. Cell viability of HaCaT cells treated with vehicle (CTRL) or increasing concentrations of CBC (0.5  $\mu$ M, 1.0  $\mu$ M, 2.5  $\mu$ M, 5.0  $\mu$ M, 10  $\mu$ M, 25  $\mu$ M), at the following time points: a) 6h, b) 12h, c) 24h. Values represent the mean  $\pm$  SEM of three independent experiments (n = 3). d) Summary of cell viability data shown in panels a-c. e) Apoptosis of HaCaT cells treated with vehicle (CTRL) or increasing concentrations of CBC (0.5  $\mu$ M, 1.0  $\mu$ M, 2.5  $\mu$ M, 5.0  $\mu$ M, 10  $\mu$ M, 25  $\mu$ M) for 24h. f) Cell cycle analysis of HaCaT cells treated with vehicle (CTRL) or increasing concentrations of CBC (1.0  $\mu$ M, 5.0  $\mu$ M, 10  $\mu$ M) for 24h. Values represent the mean  $\pm$  SEM of three independent experiments (n = 3). Statistical analysis was performed by ONE-WAY ANOVA test followed by Bonferroni *post hoc* test.

## TETRAHYDROCANNABIVARIN (THCV)

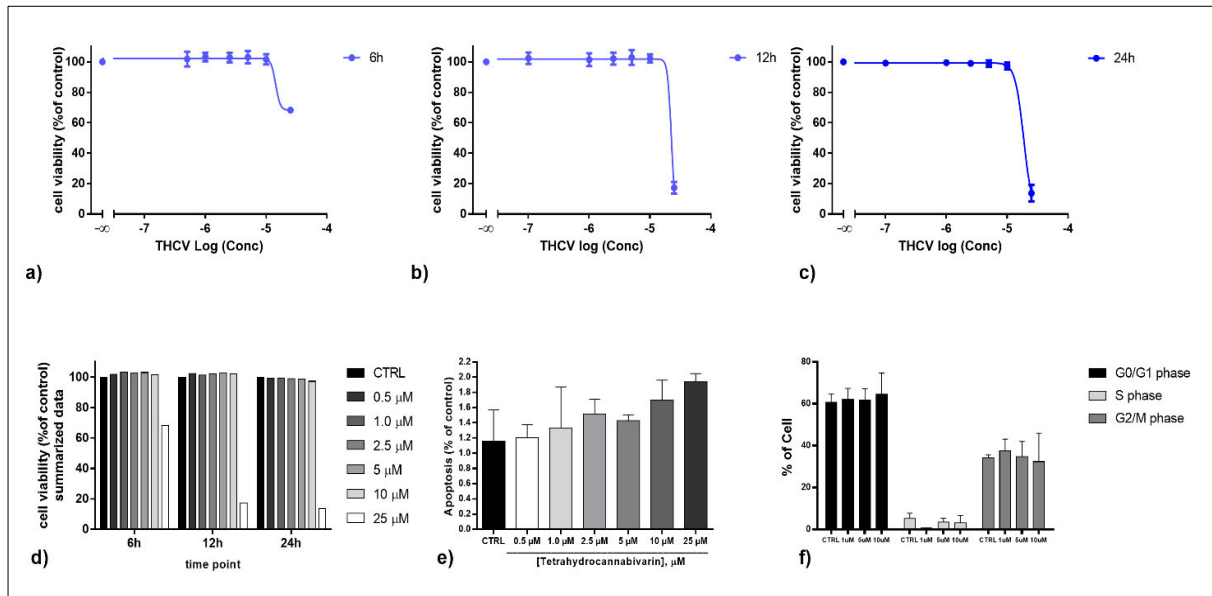

**Figure S3.** Viability, apoptosis, and cell cycle of human HaCaT cells treated with THCV. Cell viability of HaCaT cells treated with vehicle (CTRL) or increasing concentrations of THCV (0.5  $\mu$ M, 1.0  $\mu$ M, 2.5  $\mu$ M, 5.0  $\mu$ M, 10  $\mu$ M, 25  $\mu$ M), at the following time points: a) 6h, b) 12h, c) 24h. Values represent the mean  $\pm$  SEM of three independent experiments (n = 3). d) Summary of cell viability data shown in panels a-c. e) Apoptosis of HaCaT cells treated with vehicle (CTRL) or increasing concentrations of THCV (0.5  $\mu$ M, 1.0  $\mu$ M, 2.5  $\mu$ M, 5.0  $\mu$ M, 10  $\mu$ M, 25  $\mu$ M) for 24h. f) Cell cycle analysis of HaCaT cells

treated with vehicle (CTRL) or increasing concentrations of THCV (1.0  $\mu$ M, 5.0  $\mu$ M, 10  $\mu$ M) for 24h. Values represent the mean  $\pm$  SEM of three independent experiments (n = 3). Statistical analysis was performed by ONE-WAY ANOVA test followed by Bonferroni *post hoc* test.

#### CANNABIGEROLIC ACID (CBGA)

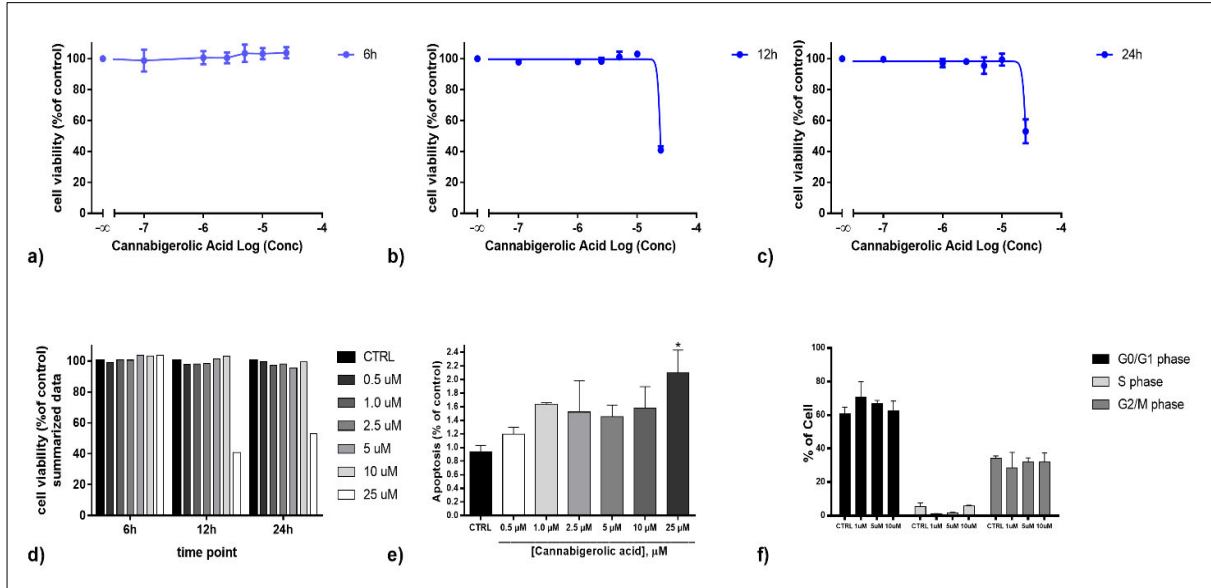

**Figure S4.** Viability, apoptosis, and cell cycle of human HaCaT cells treated with CBGA. Cell viability of HaCaT cells treated with vehicle (CTRL) or increasing concentrations of CBGA (0.5  $\mu$ M, 1.0  $\mu$ M, 2.5  $\mu$ M, 5.0  $\mu$ M, 10  $\mu$ M, 25  $\mu$ M), at the following time points: a) 6h, b) 12h, c) 24h. Values represent the mean  $\pm$  SEM of three independent experiments. d) Summary of cell viability data shown in panels a-c. e) Apoptosis of HaCaT cells treated with vehicle (CTRL) or increasing concentrations of CBGA (0.5  $\mu$ M, 1.0  $\mu$ M, 2.5  $\mu$ M, 5.0  $\mu$ M, 10  $\mu$ M, 25  $\mu$ M) for 24h. f) Cell cycle analysis of HaCaT cells treated with vehicle (CTRL) or increasing concentrations of CBGA (1.0  $\mu$ M, 5.0  $\mu$ M, 10  $\mu$ M) for 24h. Values represent the mean  $\pm$  SEM of three independent experiments (n = 3). Statistical analysis was performed by ONE-WAY ANOVA test followed by Bonferroni *post hoc* test. \*P<0.05 vs CTRL.

# Quantitation of Endogenous Levels of AEA, 2-AG and PEA

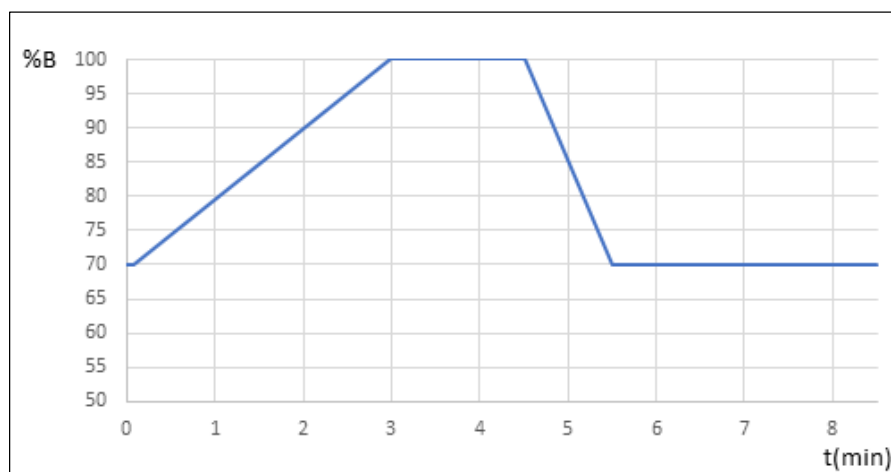

**Figure S5.** LC parameters. The chromatographic separation of target analytes was performed using a Kinetex XB-C18 1.7  $\mu\text{m}$  (100x2.1 mm), with water 0.01% v/v of formic acid as mobile phase A and acetonitrile 0.01% v/v of formic acid as mobile phase B. The chromatographic gradient shown in the figure was applied for the LC-MS/MS analysis.

**Table S1.** MS/MS parameters. Parameters of LC-MS/MS method are reported: retention time (RT), limit of quantification (LOQ), precursor mass (Q1), declustering potential (DP), entrance potential (EP), fragment mass (Q3), collision energy (CE) and collision exit potential (CXP).

| Compound | RT (min) | LOQ (pmol 10 <sup>6</sup> cells) | Q1 (m/z) | DP (eV) | EP (eV) | Q3 (m/z) | CE (eV) | CXP (eV) |
|----------|----------|----------------------------------|----------|---------|---------|----------|---------|----------|
| AEA      | 2.48     | 0.002                            | 348.0    | 93.5    | 3.6     | 62.0     | 22.0    | 4.0      |
|          |          |                                  |          |         |         | 287.1    | 21.0    | 14.0     |
| AEA d8   | 2.48     | -                                | 356.1    | 93.5    | 3.6     | 62.0     | 22.0    | 4.0      |
| 2-AG     | 2.79     | 0.164                            | 379.0    | 92.5    | 6.0     | 287.1    | 19.0    | 8.8      |
|          |          |                                  |          |         |         | 269.0    | 23.0    | 10.0     |
| 2-AG-d8  | 2.79     | -                                | 387.2    | 92.5    | 6.0     | 294.6    | 19.0    | 8.8      |
| PEA      | 2.86     | 0.004                            | 300.1    | 97.7    | 7.0     | 62.0     | 21.0    | 4.1      |
|          |          |                                  |          |         |         | 283.1    | 23.0    | 10.6     |
| PEA-d4   | 2.86     | -                                | 304.1    | 97.7    | 7.0     | 62.1     | 21.0    | 4.1      |
